# Supplementary material
Source: MDPI journal article supplement (https://www.mdpi.com/2225-1154/11/11/214)
Supplement: s1 [file s1]

Table S1. Landfire Biophysical Setting (BPS) for each western USA conifer forest type used in the analysis.

| <b>Landfire<br/>BPS Codes</b>      | <b>Landfire Ecological Systems</b>                                           | <b>BPS Area<br/>(ha)</b> |
|------------------------------------|------------------------------------------------------------------------------|--------------------------|
| <i>Dry pine forests</i>            |                                                                              | <i>12,405,879</i>        |
| 10240                              | Madrean Lower Montane Pine-Oak Forest and Woodland                           | 530,778                  |
| 10300                              | Mediterranean California Lower Montane Black Oak-Conifer Forest and Woodland | 555,284                  |
| 10310                              | California Montane Jeffrey Pine-(Ponderosa Pine) Woodland                    | 1,419,563                |
| 10530-10532                        | Northern Rocky Mountain Ponderosa Pine Woodland and Savanna                  | 3,028,738                |
| 10540-10542                        | Southern Rocky Mountain Ponderosa Pine Woodland                              | 4,283,450                |
| 10600                              | East Cascades Ponderosa Pine Forest and Woodland                             | 292,146                  |
| 11170-11172                        | Southern Rocky Mountain Ponderosa Pine Savanna                               | 1,388,192                |
| 11650                              | Northern Rocky Mountain Foothill Conifer Wooded Steppe                       | 60,770                   |
| 11790-11792                        | Northwestern Great Plains-Black Hills Ponderosa Pine Woodland and Savanna    | 846,958                  |
|                                    |                                                                              |                          |
| <i>Dry mixed-conifer forests</i>   |                                                                              | <i>13,068,389</i>        |
| 10210                              | Klamath-Siskiyou Lower Montane Serpentine Mixed Conifer Woodland             | 152,190                  |
| 10260                              | Madrean Upper Montane Conifer-Oak Forest and Woodland                        | 8,016                    |
| 10270                              | Mediterranean California Dry-Mesic Mixed Conifer Forest and Woodland         | 2,603,180                |
| 10450-10454                        | Northern Rocky Mountain Dry-Mesic Montane Mixed Conifer Forest               | 8,717,957                |
| 10510                              | Southern Rocky Mountain Dry-Mesic Montane Mixed Conifer Forest and Woodland  | 1,587,046                |
|                                    |                                                                              |                          |
| <i>Moist mixed-conifer forests</i> |                                                                              | <i>16,357,705</i>        |
| 10110                              | Rocky Mountain Aspen Forest and Woodland                                     | 2,712,606                |
| 10180                              | East Cascades Mesic Montane Mixed-Conifer Forest and Woodland                | 669,852                  |
| 10220                              | Klamath-Siskiyou Upper Montane Serpentine Mixed Conifer Woodland             | 88,748                   |

|                          |                                                                         |                   |
|--------------------------|-------------------------------------------------------------------------|-------------------|
| 10280                    | Mediterranean California Mesic Mixed Conifer Forest and Woodland        | 2,883,944         |
| 10320-10322              | Mediterranean California Red Fir Forest                                 | 1,377,706         |
| 10470,10472              | Northern Rocky Mountain Mesic Montane Mixed Conifer Forest              | 2,022,585         |
| 10520                    | Southern Rocky Mountain Mesic Montane Mixed Conifer Forest and Woodland | 924,059           |
| 10610-10612              | Inter-Mountain Basins Aspen-Mixed Conifer Forest and Woodland           | 2,936,953         |
| 11660,11662              | Middle Rocky Mountain Montane Douglas-fir Forest and Woodland           | 2,741,252         |
|                          |                                                                         |                   |
| <i>Subalpine forests</i> |                                                                         | <i>14,356,199</i> |
| 10200                    | Inter-Mountain Basins Subalpine Limber-Bristlecone Pine Woodland        | 64,893            |
| 10330                    | Mediterranean California Subalpine Woodland                             | 239,997           |
| 10380                    | North Pacific Maritime Mesic Subalpine Parkland                         | 82,520            |
| 10440                    | Northern California Mesic Subalpine Woodland                            | 19,612            |
| 10460                    | Northern Rocky Mountain Subalpine Woodland and Parkland                 | 2,641,492         |
| 10500                    | Rocky Mountain Lodgepole Pine Forest                                    | 849,849           |
| 10550                    | Rocky Mountain Subalpine Dry-Mesic Spruce-Fir Forest and Woodland       | 6,402,685         |
| 10560                    | Rocky Mountain Subalpine Mesic-Wet Spruce-Fir Forest and Woodland       | 3,863,846         |
| 10570                    | Rocky Mountain Subalpine-Montane Limber-Bristlecone Pine Woodland       | 80,924            |
| 10580-10582              | Sierra Nevada Subalpine Lodgepole Pine Forest and Woodland              | 110,381           |
